# Supplementary material for: Effects of aerobic, strength, and combined training during pregnancy in the blood pressure: A systematic review and meta-analysis
Source: Front Physiol. 2022 Aug 30;13:916724. doi: 10.3389/fphys.2022.916724 (PMC9468920; doi:10.3389/fphys.2022.916724)
Supplement: Supplementary file 1 [file Table1.XLSX]

## Sheet: descriptions
Study	1	2	3	4	5	6	7a	7b	8	9	10	11	12	13	14a	14b	15	16a	16b	SBP results	DBP results
Baciuk et al. (2008)	Not reported	Not reported	Not reported	Not reported	Not reported	Not reported	Not reported	Individual HR	The exercises were not weel	No home programme	No	Morbid obesity (n=1); fetal malformation (n=1); fetal death (n1);	Not reported	Program duration: 20-w of pregnancy until delivery	Generic	Each participant exercised according their individual HR	Not reported	Not reported	Not reported	↑ in EG compared to pre	→
									described			difficult to follow exercises (n=4)		Modality: Water aerobics		With a HR monitor
														Session duration: 50-min
														Frequency: 3 sessions/w
														Intensity: 70% HRmax
Bahadoran et al. (2015)	Not reported	Not reported	Not reported	Not reported	Not reported	Not reported	Not reported	Breathing test	It was not clear if walking was on the	No home programme	No	Not reported	Not reported	Program duration: 20-w	Generic	Not reported	Not reported	Not reported	Not reported	→	→
									land or treadmill					Modality: Walking
														Session duration: 30 to 45-min
														Frequency: 5 sessions/w
														Intensity: Not clear
Carpenter et al. (2015)	Recumbent	Exercise classes were led or	Not reported	Supervised	Not reported	Not reported	According to Royal College of	Heart rate target zones	The exercises were not weel	No home programme	No	Breech (n=1); prolonged rupture (n1);	Not reported	Program duration: 20-w of pregnancy until delivery	Generic	Not reported	Not reported	Not reported	Not reported	→	→
	cycle	supervised by a qualified midwife					Obstetrics and Gynaecology		described			low platelets (n=1)		Modality: Recumbent cycling/water exercises
														Session duration: 18-min + streching + pelvic floor exercises
														Frequency: weakly
														Intensity: load increased every 2-min until HR zone
														Water exercises: 30-min light to moderate intensity
Daniel et al. (2015)	Not reported	Physiotherapist who is also a	Not reported	Supervised	Not reported	Not reported	According to American College of	RPE	The exercises were not weel	No home programme	No	Not reported	Not reported	Program duration: 8-w	Generic	Individual RPE	Not reported	Not reported	Not reported	↓ in EG compared to baseline.	↓ in EG compared to baseline.
		maternal exercise instructor					Obstetrics and Gynecology		described					Modality: Aerobic dance						↑ in CG compared to baseline	↑ in CG compared to baseline
														Session duration: 45 to 60-min
														Frequency: 2 to 3 sessions/w
														Intensity: RPE 12 to 13
														Complementary exercises: stretching
Guelfi et al. (2016)	Cycle	Exercise physiologist	Individually	Supervised	86% of adherence	Not reported	Not reported	Age-predicted HRmax	Exercises in a cycle ergometer	No home programme	No	Pregnancy loss (n=1); no postintervention assessment (n=3)	Supervised exercise at home	Program duration: 14-w	Generic	Individual HR and RPE	Not reported	Physiologist visits	Not reported	↓ in EG and CG at pos compared to baseline	↓ in EG and CG at pos compared to baseline
	ergometer													Modality: Stationary cycling
														Session duration: 20-30-min to 60-min
														Frequency: 3 sessions/w
														Intensity: vary from 55–65% HRmax; RPE 12–13 to
														75–85% HRmax; RPE 14–16
Melo et al. (2012)	Not	Physical education	Not reported	Supervised	The women analyzed	Not reported	According to American College of	HR and RPE	Exercises in a treadmill	No home programme	No	Newborns between 37 to 38-w (n=12); Premature delivery (n=6);	Exercise was performed in the open air at a mild	Program duration: 13 or 20-w of pregnancy until delivery	Generic	Individual HR and RPE	VO2max test	Not reported	Not reported	→	→
	aplicable	professionals			permformed at least		Obstetrics and Gynecology					lost scheduled visit (n=6)	temperature (24°C) and supervised	Modality: Walking
					85% of the exercises									Session duration: 15-min and increased according progression
														Frequency: 3 sessions/w
														Intensity: 60–80% HRmax; RPE 12–16
Seneviratne et al. (2016)	Stationary	Exercise physiologist	Individually	Supervised	In average, 33% of the sessions	Not reportes	Not reported	Individual HR (40-59% VO2 reserve)	Exercises performed in stationary	No home programme	No	There were no adverse events	Supervised exercise at home	Program duration: 20 to 35-w of pregnancy	Generic	Individual HR and VO2 reserve	VO2 reserve test	Physiologist visits	Not reported	→	→
	bicycles				were completed. One third				bicycles					Modality: Cycle
					of participants completed									Session duration: 15 to 30-min
					more than 30 of 67 sessions									Frequency: 3 to 5 sessions/w
														Intensity: moderate (HR according to 40-59% VO2 reserve)
Stutzman et al. (2010)	Not reported	Not reported	Not reported	Supervised	Not reported	Not reported	According to American College	HR and RPE	The exercises were not weel	No home programme	No	Not reported	Not reported	Program duration: 16-w	Generic	Individual HR and RPE	Steady-state protocol	Not reported	Not reported	↑ in CG2 (overweight) compared to baseline	↑ in CG2 (overweight) compared to baseline
							of Sports Medicine		described					Modality: Walking
														Distance: 0.6 to 3.0 Km/day
														Frequency: 5 sessions/w
														Intensity: ≤40% HR reserve; RPE 11-12
														Complementary exercises: stretching and mobility
Barakat, Pelaez, et al. (2014)	Dumbbells,	Fitness specialisy	Group	Supervised	The adherence was 87%	Music	Not reported	Not reported	The exercises were identifyed	No home programme	No	Discontinued intervention (n8); risk of premature labor (n-3);	Supervised exercise at Health Care Center	Program duration: 8 to 10-w until 38 to 39-w of pregnancy	Generic	Individual HR and RPE	Not reported	Not reported	Not reported	→	→
	machines,											pregnancy-induced hypertension (n=2); personal reasons (n=9)		Modality: ST
	theraband													Session duration: 55-60-min
														Frequency: 3 sessions/w
														Intensity: 60-75% HR (core session - 35-min)
														1 set of dance (not specifyed)
														Number of sets: 1
														Number of repetitions: 10-12
O’Connor et al. (2011)	Dumbbells	Exercise specialists	Not reported	Supervised	The adherence was 81%	Not reported	External load based on RPE	Increasing the load according to RPE	The exercises were identifyed	No home programme	No	Symptoms associated with an acute bout of ST: dizziness (n=8);	Not reported	Program duration: 12-w	Generic	Individual RPE	Not reported	Not reported	Not reported	→	→
	and							and training volume				abdominal or pelvic pain (n=4)		Modality: ST
	machines													Session duration: 45-min
														Number of exercises: 6
														Number of sets: 2
														Number of repetitions: 15
														Cadence: 2/2-sec
														Interval between sets: 1-min
														Interval between exercises: 2-min
														Intensity: Low to moderate (RPE 11-13)
Barakat et al. (2011)	Barbells	Fitness specialist	Group	Supervised	The adherence was 90%	Music	Not reported	Individual HR	The exercises were identifyed	No home programme	No	Risk of premature labor (n=1); pregnancy-induced hypertension	Exercises performed in a Well-lit room under	Program duration: 6 to 9-w of pregnancy until delivery	Generic	Individual predicted HR zone	Not reported	Not reported	Not reported	→	→
	Theraband											(n=1); personal reason (n=4)	favorable environmental conditions (altitude	AT
													600 m; temperature, 19-21°C;	Modality: Walking, aerobic dance/ST
													humidity, 50–60%)	Session duration: 35 to 45-min
														Frequency: 3 sessions/w
														Intensity: 70% predicted HRmax
														ST
														Number of exercises: 13
														Number of sets: 1
														Number of repetitions: 10-12
														Intensity: Not reported
Barakat et al. (2012)	Barbells	Fitness specialist	Group	Supervised	The adherence was 85%	Music	Not reported	Not reported	The exercises were not weel	No home programme	No	Risk of premature labor (n=3); risk of premature labor (n=3);	Exercises performed in a Well-lit room under	Program duration: 6 to 9-w of pregnancy until delivery	Generic	Not reported	Not reported	Not reported	Not reported	→	→
	Theraband								described			diagnosed incompetent cervix (n=2); personal reason (n=5)	favorable environmental conditions (altitude	AT
													600 m; temperature, 19-21°C;	Modality: Swimming, water aerobics/ST
													humidity, 50–60%)	Session duration: 35 to 45-min
														Frequency: 3 sessions/w
														Intensity: Not reported
														ST
														Number of exercises: Not reported
														Number of sets: 1
														Number of repetitions: 10-12
														Intensity: Not reported
Barakat, Perales, et al. (2014)	Not	Fitness specialist	Group	Supervised	The adherence was 95%	Music	AccordingNational Board of	Individual HR and RPE	The exercises were not weel	No home programme	No	Discontinuous intervention (n=14); risk of premature labor (n=2);	Exercises performed in a Well-lit room under	Program duration: 9-13 to 39-40-w of pregnancy	Generic	Individual predicted HR zone	Not reported	Not reported	Not reported	→	→
	reported						Health in Denmark		described			pregnancy -induced hypertension (n=2); personal reasons (n=12)	favorable environmental conditions (altitude	AT
													600 m; temperature, 19-21°C;	Modality: Aerobic dance, walking /ST
													humidity, 50–60%)	Session duration: 35 to 45-min
														Frequency: 3 sessions/w
														Intensity: 55-60% HRreserve
														ST
														Number of exercises: Not specifyed
														Number of sets: Not specifyed
														Number of repetitions: Not specifyed
														Intensity: Not specifyed
														Complementary exercises: balance and pelvic floor exercises
Fernández-Buhigas et al. (2020)	Not	Exercise specialist	Not reported	Supervised	The minimal adherence	Not reported	According to American College of	Individual HR and RPE	The exercises were not weel	No home programme	No	No blood tests results (n=1); no compliance with the	Exercises performed in a Hospital gym	Program duration: 12-15 to 38-39-w of pregnancy	Generic	Individual HR and RPE	Not reported	Not reported	Not reported	→	→
	reported				was 70%		Obstetrics and Gynecology		described			exercise program (n=28)		AT
														Modality: Aerobic exercise /ST
														Session duration: 60-min
														Frequency: 3 sessions/w
														Intensity: 55-60%; 12-14 RPE
														ST
														Duration: 10-min
														Number of exercises: Not specifyed
														Number of sets: Not specifyed
														Number of repetitions: Not specifyed
														Intensity: Not specifyed
														Complementary exercises: coordination, pelvic floor
														exercises, and stretching
Garnæs et al. (2016)	Treadmill	Physical therapist	Not reported	Supervised	Not reported	Interview	According to American College of	Individual RPE	The exercises were identifyed	35 min of endurance training,	No	Abortion (n=3); not metting the inclusion criteria (n=1);	Not reported	Program duration: 12-18-w of pregnancy until delivery	Generic	Individual RPE and according the	Not reported	Not reported	Not reported	↓ in EG compared to CG at post	→
							Obstetrics and Gynecology			15 min of strength exercises, and		other reasons (n=4)		AT		woman’s strength level
										daily pelvic floor exercises				Modality: Jogging /ST
														Session duration: 60-min
														Frequency: 3 sessions/w
														Intensity: 12-15 RPE
														ST
														Number of exercises: 6
														Number of sets: 3
														Number of repetitions: 10
														Intensity: Not specifyed
Haakstad et al. (2016)	Not aplicable	Qualified aerobics instructors	Group	Supervised	53% of the women attended	Not reported	According to American College of	Individual RPE	The exercises were not weel	Walking, skiing, biking,	No	Unknown reason (n=6); excluded (n=1); pelvic girdle pain (n=4);	Not reported	Program duration: 12-24 to 36-38-w of pregnancy	Generic	Individual RPE	Treadmill walking test	Not reported	Not reported	↓ in EG compared to CG at post	↓ in EG compared to CG at post
					the exercise dosage of at least		Obstetrics and Gynecology		described	ST, and swimming		premature birth (n=2); hypertension (n=1); aminiotic fluid (n=1);		AT
					80%. 91% of the women							vaginal bleeding (n=1); asthma (n=1)		Modality: Aerobic dance /ST
					returned the diaries									Session duration: 60-min
														Frequency: 3 sessions/w
														Intensity: 12-14 RPE
														ST
														Number of exercises: Not reported
														Number of sets: 3
														Number of repetitions: 12-15
														Intensity: Not specifyed
Perales et al. (2016)	Dumbbells	Fitness instructor	Group	Supervised	The adherence was in	Not reported	According to American College of	Individual HR target zone and RPE	Online supplementary appendices	No home programme	No	Rink of preterm delivery (n=5); obstetric complications (n=4);	Not reported	Program duration: 9 to 11-w of pregnancy until delivery	Generic	Individual HR reserve	Not reported	Not reported	Not reported	↑ in EG and CG compared to baseline	→
	Body weight				average 90%		Obstetrics and Gynecology		provided with comprehensive			start exercise (n=6); personal reasons (n=17)		AT
									photographs					Modality: Coreographies /ST
														Session duration: 55 to 60-min
														Frequency: 3 sessions/w
														Intensity: 55-60% HR reserve
														ST
														Number of exercises: 5
														Number of sets: 1-2
														Number of repetitions: 15
														Intensity: Not specifyed
Perales et al. (2020)	Barbells	Physical activity counseling	Not reported	Supervised	The adherencewas > 95%	Not reported	Not reported	Individual HR target zone and RPE	Exercises performed can be seen in	The women were not discouraged	No	Unable to contact (n=361); refused to participate (n=77);	The two trials were performed in two different	Program duration: 9 to 38-39-w of pregnancy	Generic	Individual HR and RPE	Not reported	Not reported	Not reported	↓ in EC2 compared to EC3 at post	→
	Therabands	from healthcare professionals							Supplementary Materials	from exercising on their own		willing to particpate, but never did it (n=41)	medical centers, but shared the same	AT
													methodology in terms of exercise intervention	Modality: Low impact dance and stretching /ST						↓ in EG3 compared to CG3 at post
														Session duration: 50 to 55-min
														Frequency: 3 sessions/w
														Intensity: 60% of age-predicted Hrmax; 10-12 RPE
														ST
														Number of exercises: 4
														Number of sets: not reported
														Number of repetitions: not reported
														Intensity: Not specifyed
Ramírez-Vélez et al. (2011)	Not	A physiotherapist and a physical	Group	Supervised	The degree of adherence	Music	According to American College of	Individual HR	The exercises were not weel	No home programme	No	Changed location (n=3); did not return for prenatal care (n=3);	Exercises performed in a spacious, well-lit room	Program duration: 11-w	Generic	Individual HR	Not reported	The sessions were supervised by a physioterapist	Not reported	→	→
	reported	educator were present during			of the exercise group was 75%		Obstetrics and Gynecology		described			Took out private health insurance and changed health care	under favorable environmental conditions (altitude	AT				in order to verify fidelity and adherence
		the exercise sessions										provider (n=3)	~900 m; temperature = 22–28°C; humidity = 50–60%	Modality: Aerobic exercise /power training
													0.6	Session duration: 60-min
														Frequency: 3 sessions/w
														Intensity: moderate to vigorous (not specifyed)
														ST
														Duration: 25-min
														Number of exercises: not specifyed
														Number of sets: not reported
														Number of repetitions: not reported
														Intensity: Not reported
Silva-Jose et al. (2021)	Barbells	Not reported	The exercises were performed in	The exercises sessions	Minimal adherence was	Not reported	Not reported	Individual HR and RPE	The exercises were not weel	No home programme	No	Low adherence (n=10); Premature delivery (n=3);	Virtual exercise program during COVID-19	Program duration: 8-10 to 38-39w of pregnancy	Generic	Individual HR and RPE	Not reported	Not reported	Not reported	→	→
	Therabands		group once a week and individually	performed individually	required: 80%				described			change hospital (n=8); other reasons (n=9)	pandemic	AT
			twice a week	were not supervised, and the										Modality: Aerobic exercise /ST
				sessions performed in groups										Session duration: 55 to 60-min
				were superveised by										Frequency: 3 sessions/w
				video conference										Intensity: 55-65% HR reserve; 12-14 RPE
														ST
														Duration: 10 to 12-min
														Number of exercises: not specifyed
														Number of sets: 1-2
														Number of repetitions: 10-12
														Intensity: Not reported
														Complementary exercises: coordination, pelvic floor
														exercises, and balance
Legend: w: weeks; ST: strength training; HR: heart rate; max: maximum; RPE: rating of perceived exertion; ↑: significant increase; ↓: significant decrease; →: no significant statistical difference.
